# Supplementary material for: Constitutive patterns of gene expression regulated by RNA-binding proteins
Source: PubMed Central journal article supplement (PMC4054784; doi:10.1186/gb-2014-15-1-r13), 2014-01-02
Supplement: gb-2014-15-1-r13-S2.pdf [file gb-2014-15-1-r13-S2.pdf]

**A****Transcript-Transcript correlations**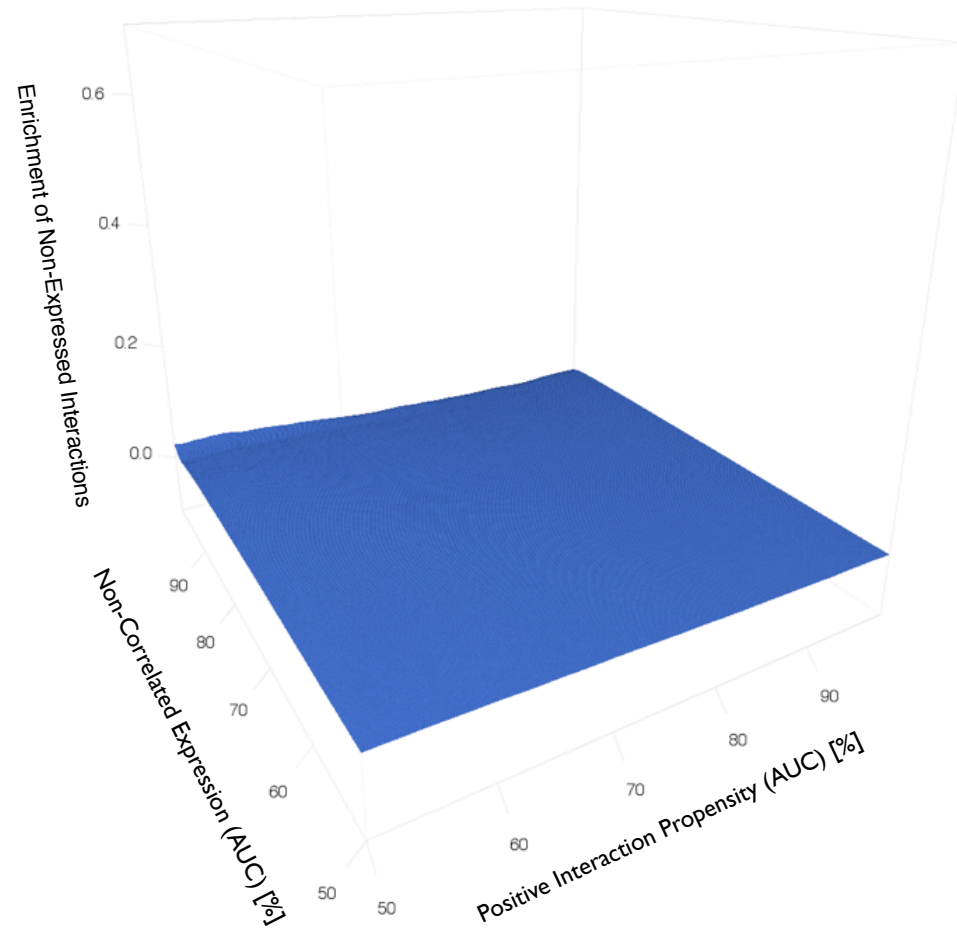**B****Protein-Transcript correlations**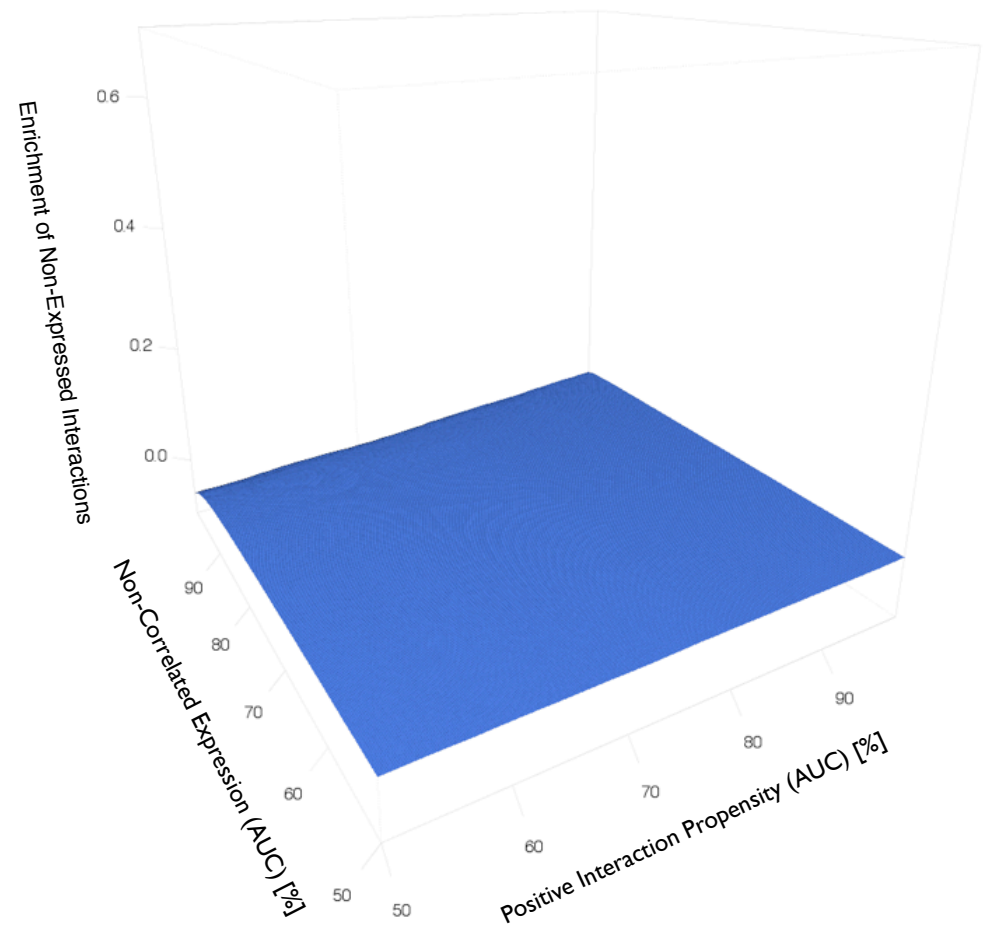**Figure S1**

**A**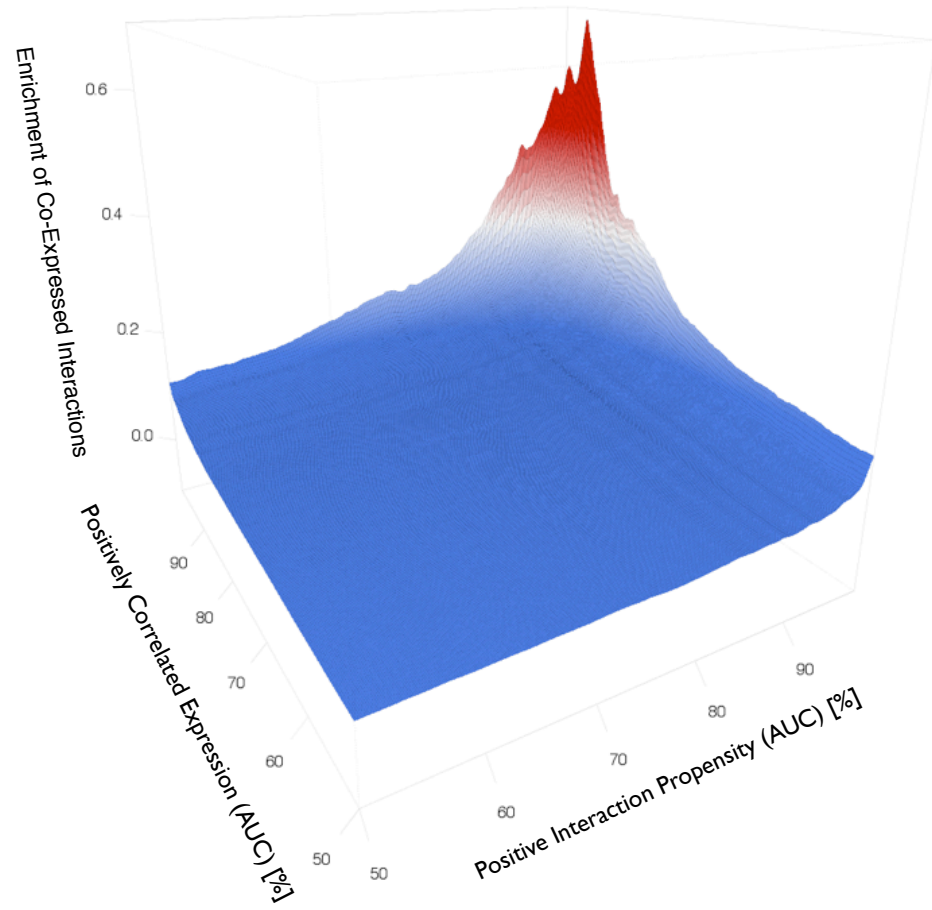**B**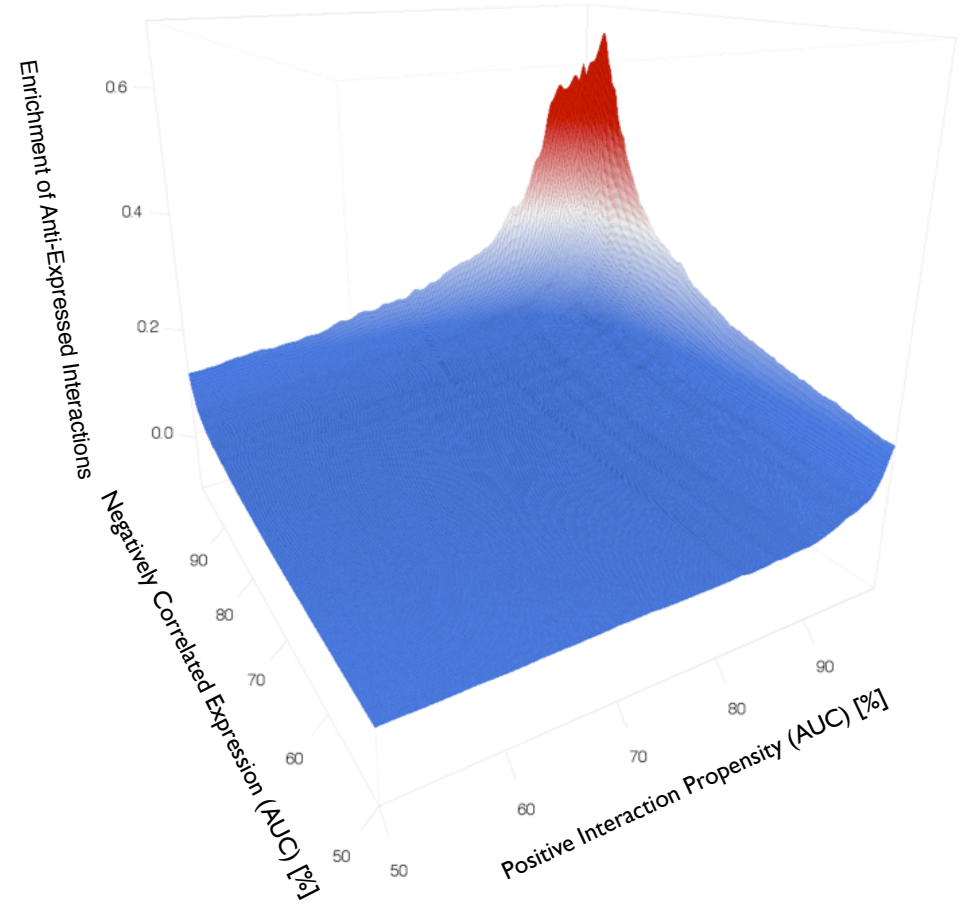**Figure S2**

**HUR: p-value distribution**

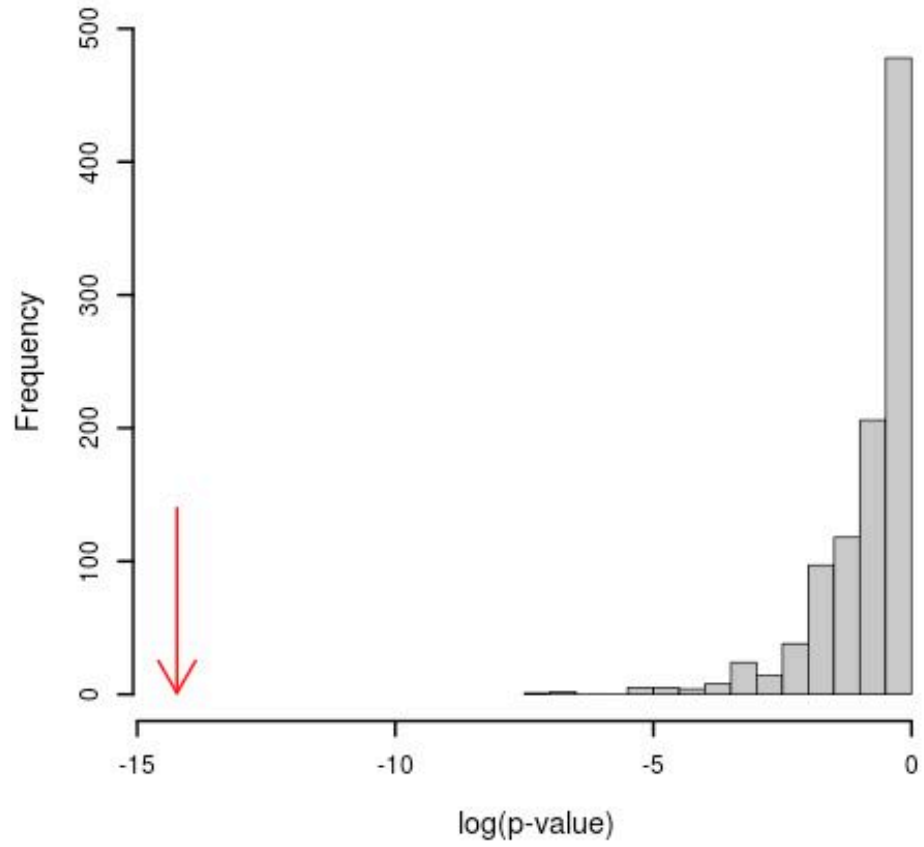

**LIN28B: p-value distribution**

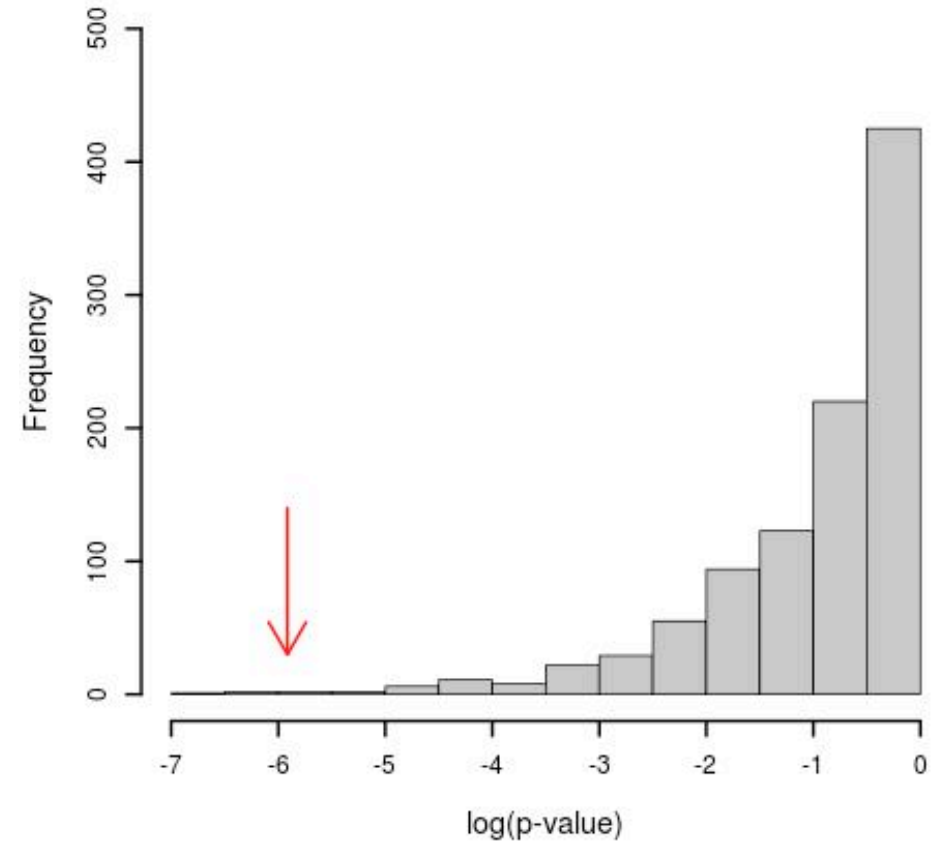

**Figure S3**

A

ROC Comparison (HUR)

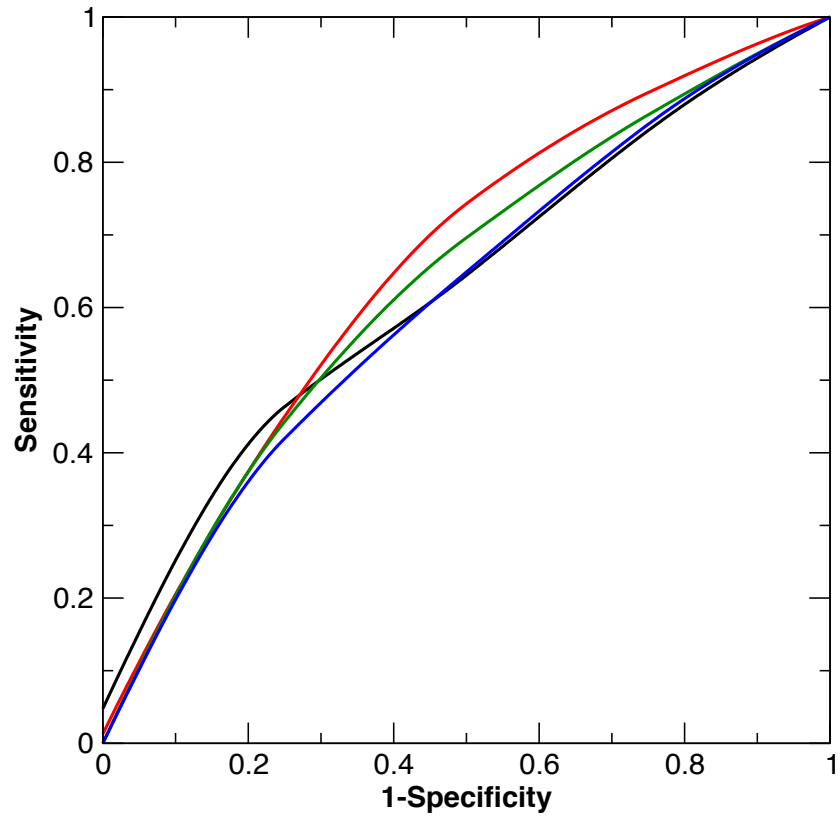

ROC Comparison (LIN28B)

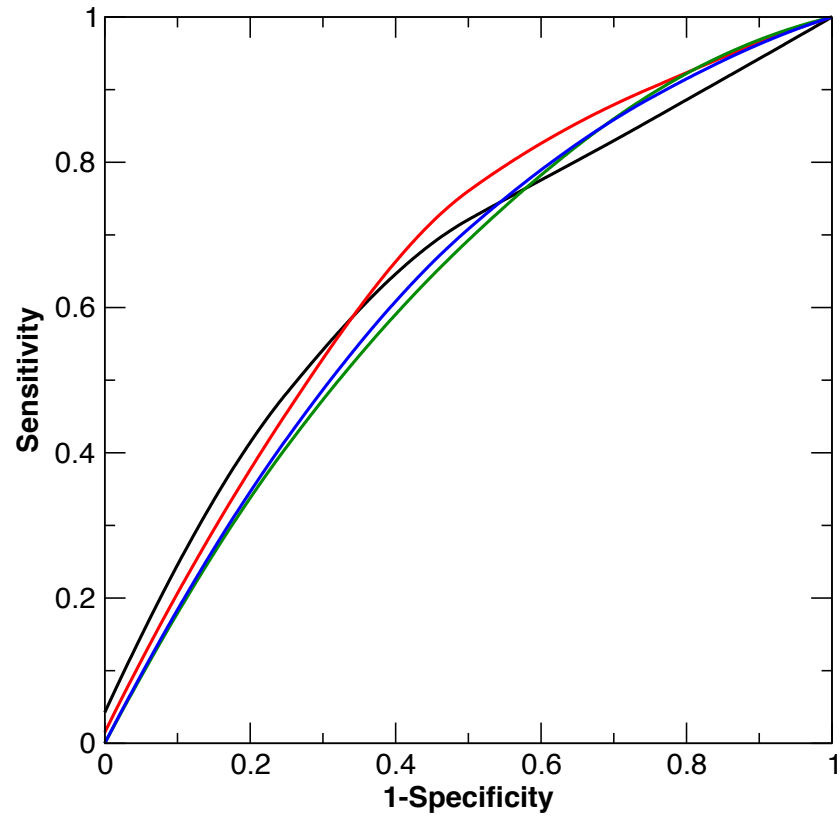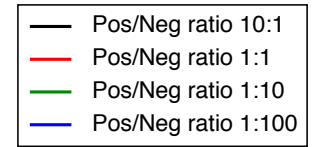

Figure S4

**B**

**Precision-Recall Comparison (HUR)**

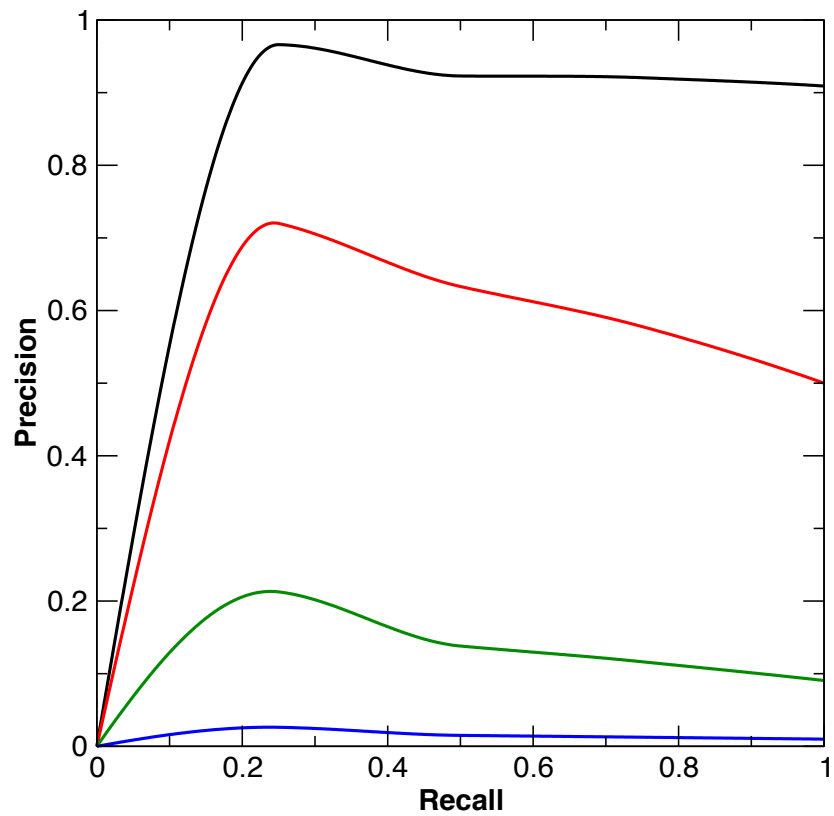

**Precision-Recall Comparison (LIN28B)**

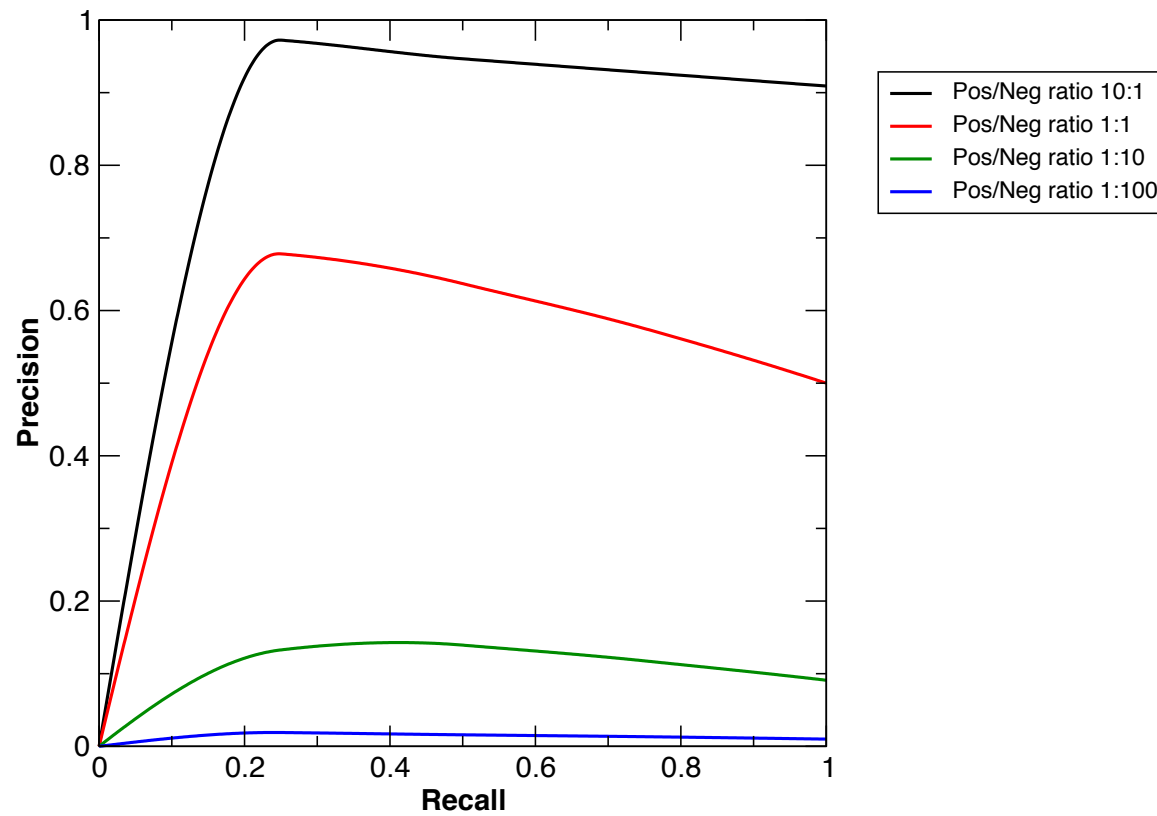

— Pos/Neg ratio 10:1  
— Pos/Neg ratio 1:1  
— Pos/Neg ratio 1:10  
— Pos/Neg ratio 1:100

**Figure S4**

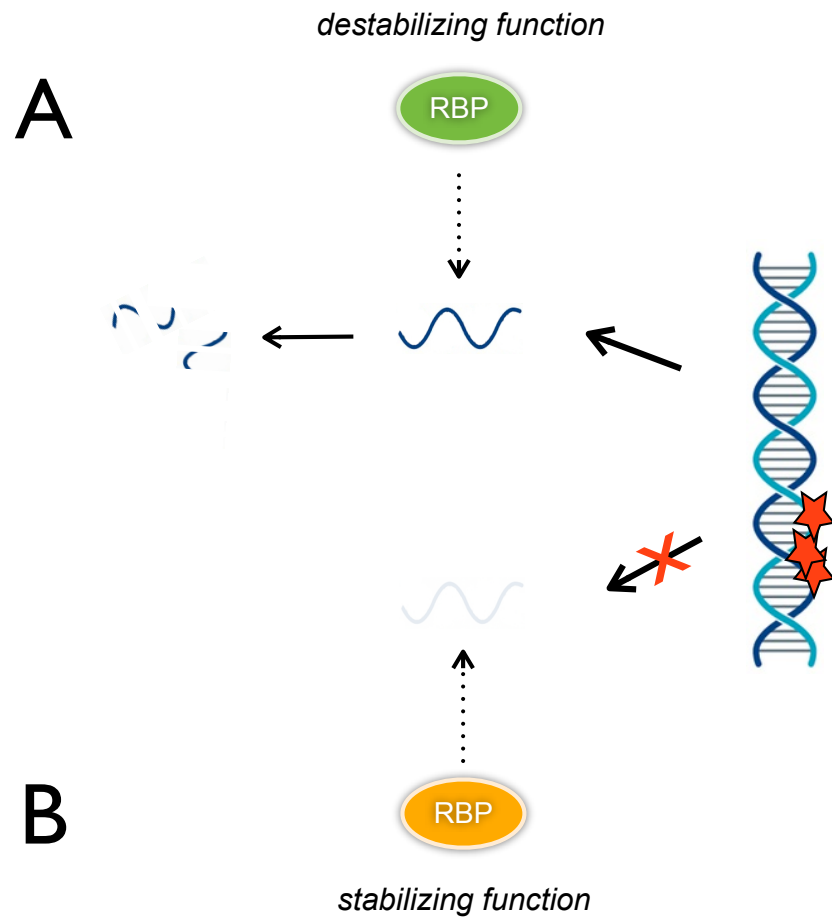

Figure S5

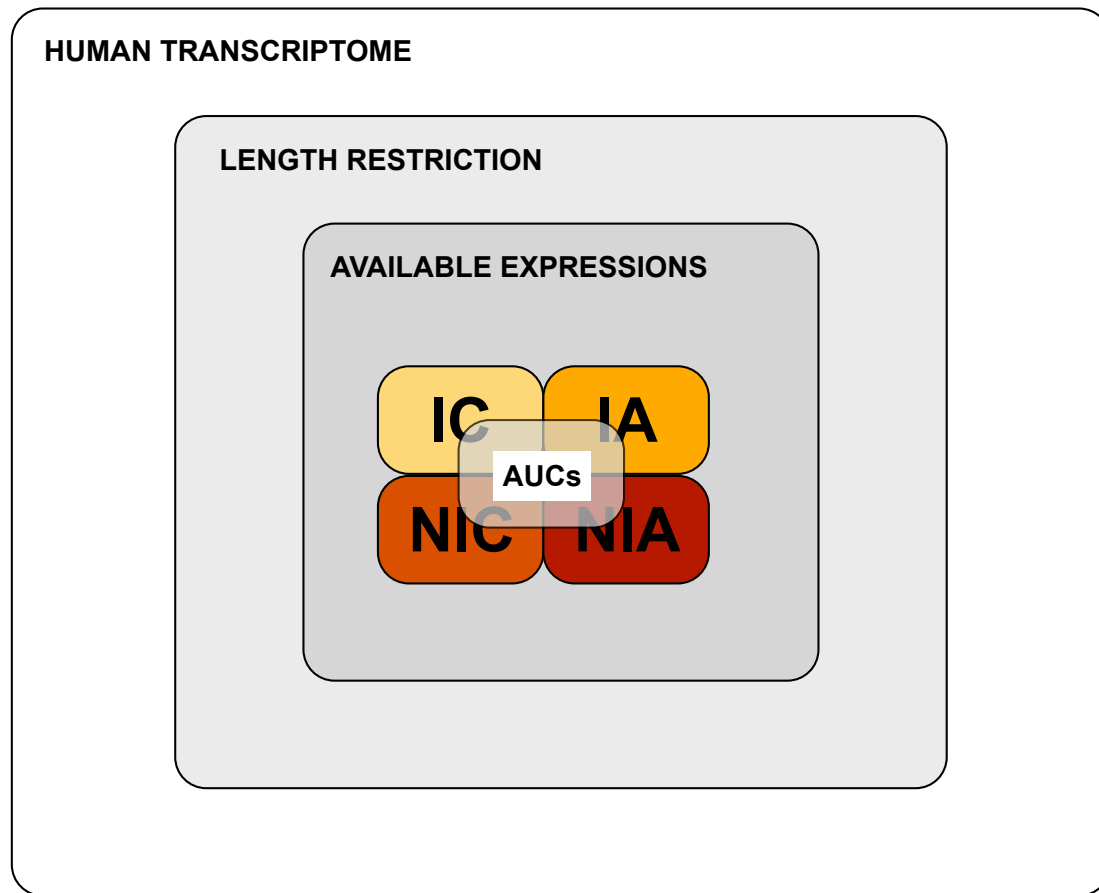

Figure S6

### Sequence redundancy reduction in mRNAs database

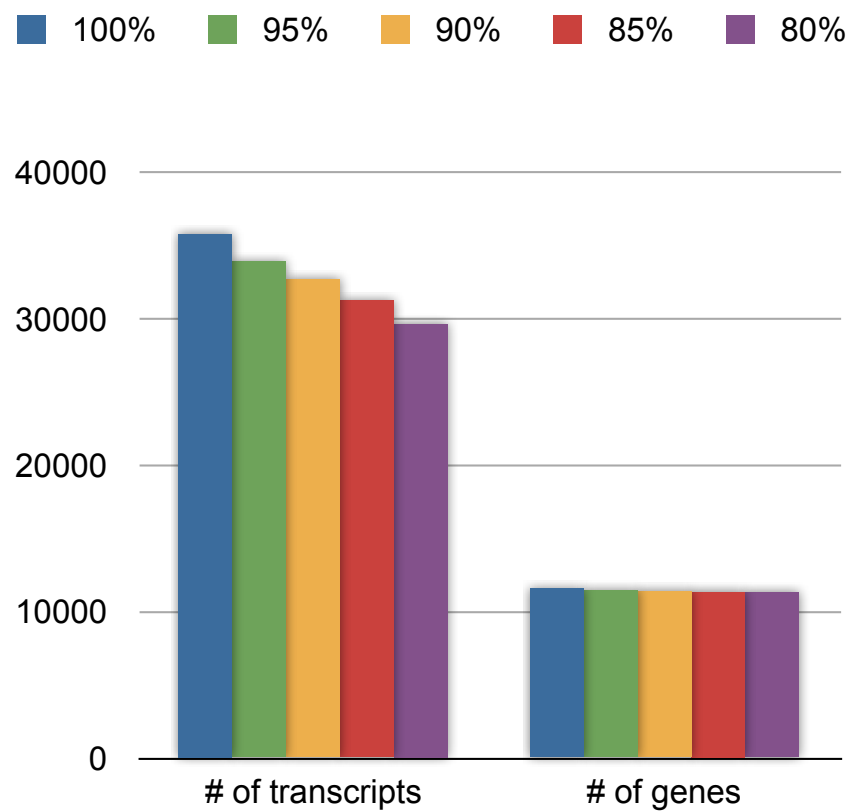

**Figure S7**
